# Supplementary material for: Meiotic drive is associated with sexual incompatibility in Neurospora
Source: PubMed Central journal article supplement (PMC9828778; doi:10.1111/evo.14630), 2022-10-03

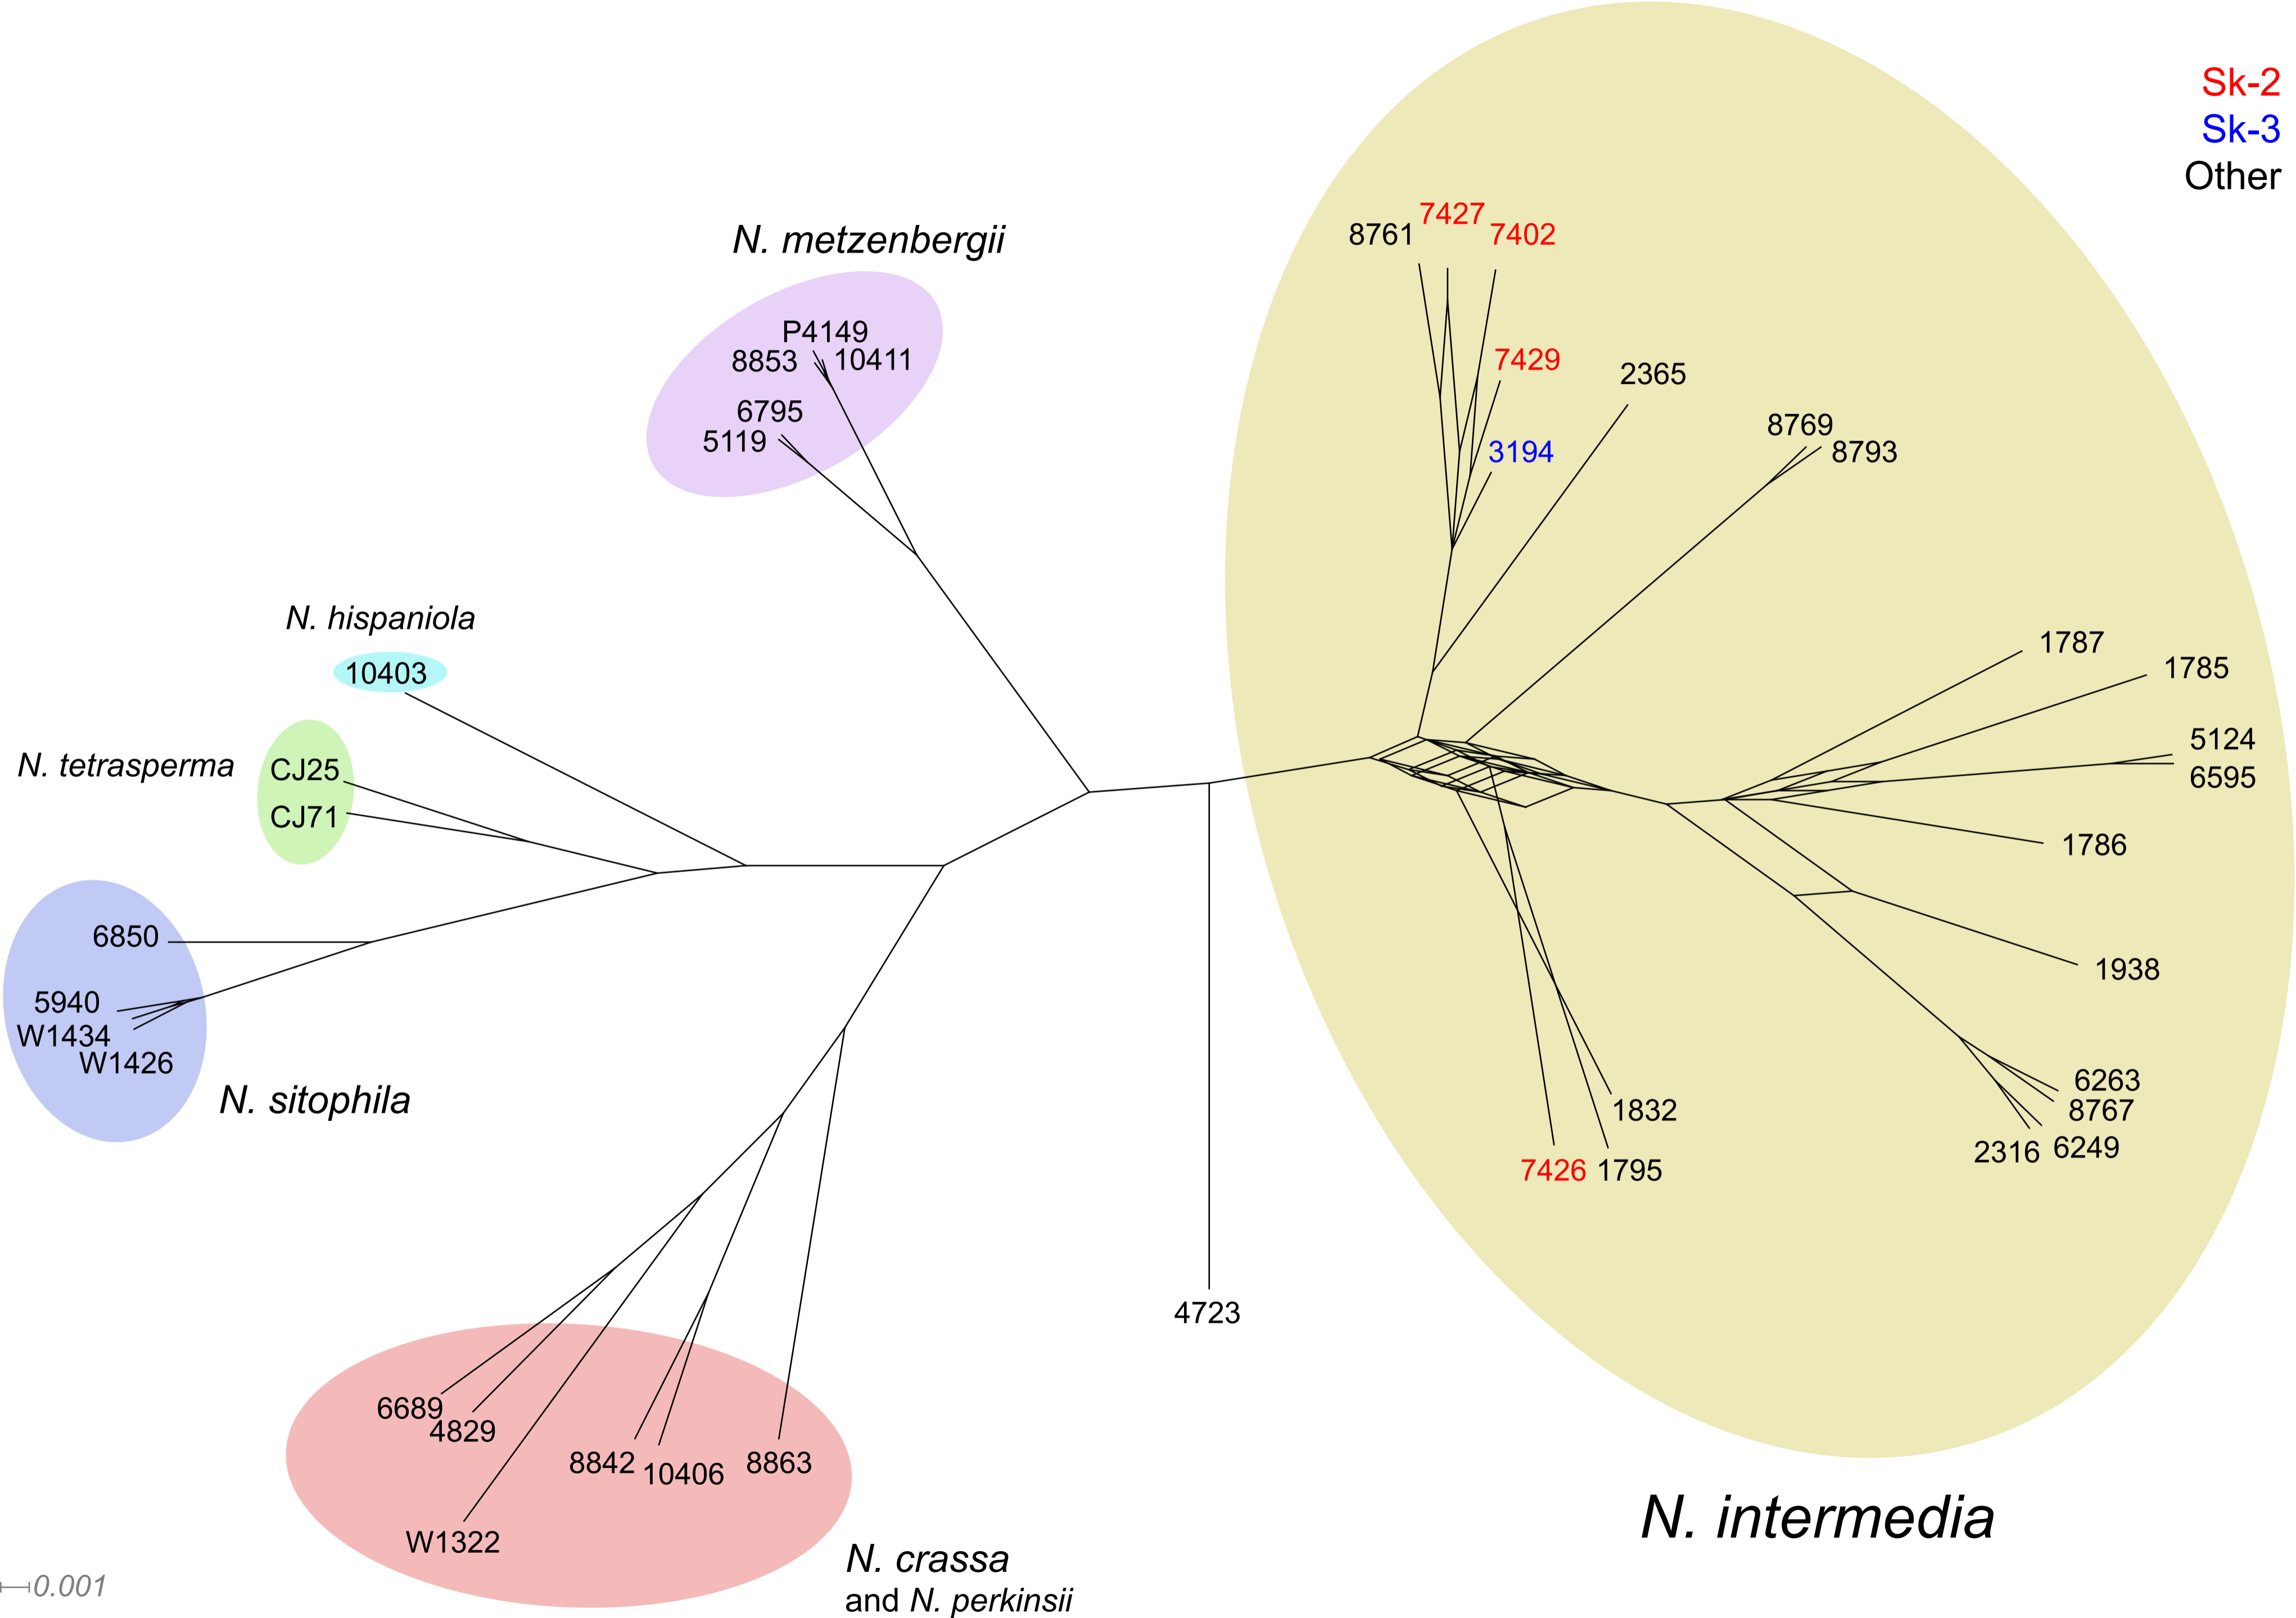

Supplement: EVO-76-2687-s005.pdf [file EVO-76-2687-s005.pdf]
